# Supplementary material for: Comprehensive genetic diversity and genome-wide association studies revealed the genetic basis of avocado fruit quality traits
Source: Frontiers journal article supplement (doi:10.3389/fpls.2024.1433436), 2024-08-13
Supplement: Data_Sheet_1.pdf [file Data_Sheet_1.pdf]

# Supplementary Materials

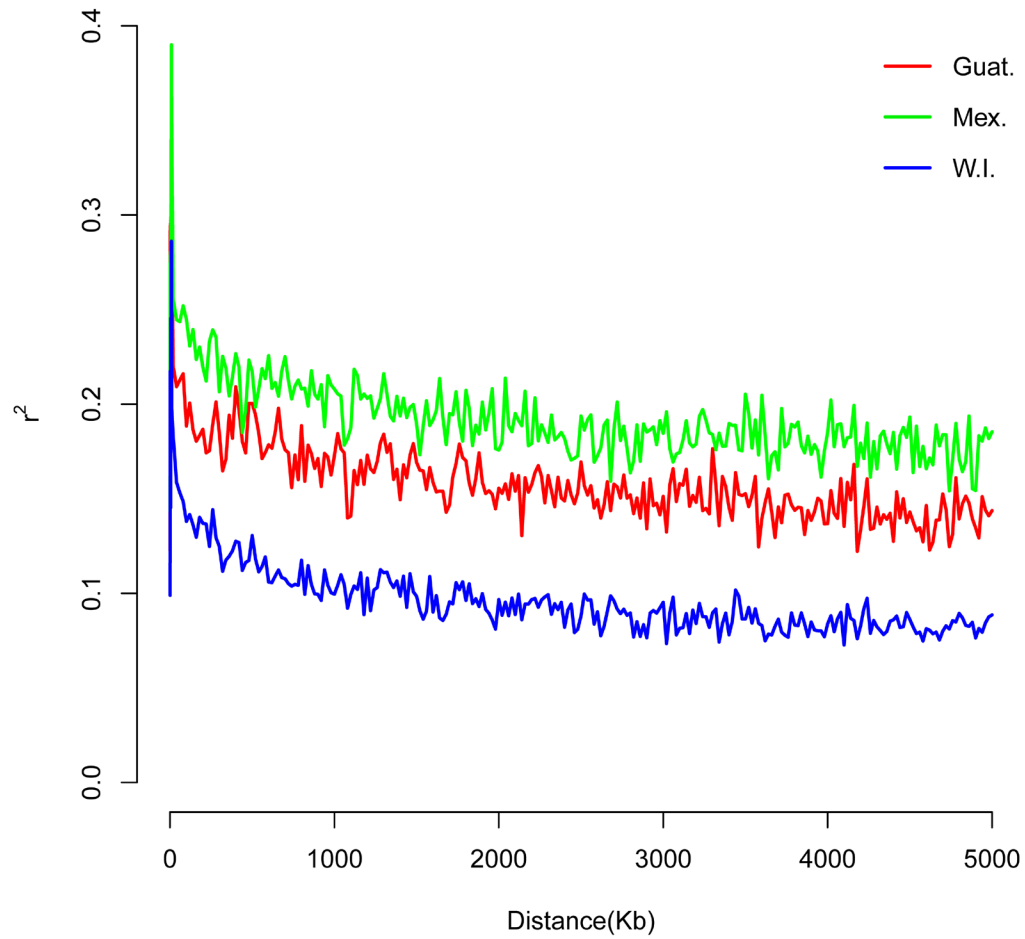

Figure S1. Genome-wide linkage disequilibrium (LD) decay plot drawn by PopLDdecay with squared correlation ( $r^2$ ) plotted against genetic distance for SNP pairs. Bin1 and Bin2 window sizes were set to 1 kb and 20 kb, respectively, with a breakpoint at 10 kb.

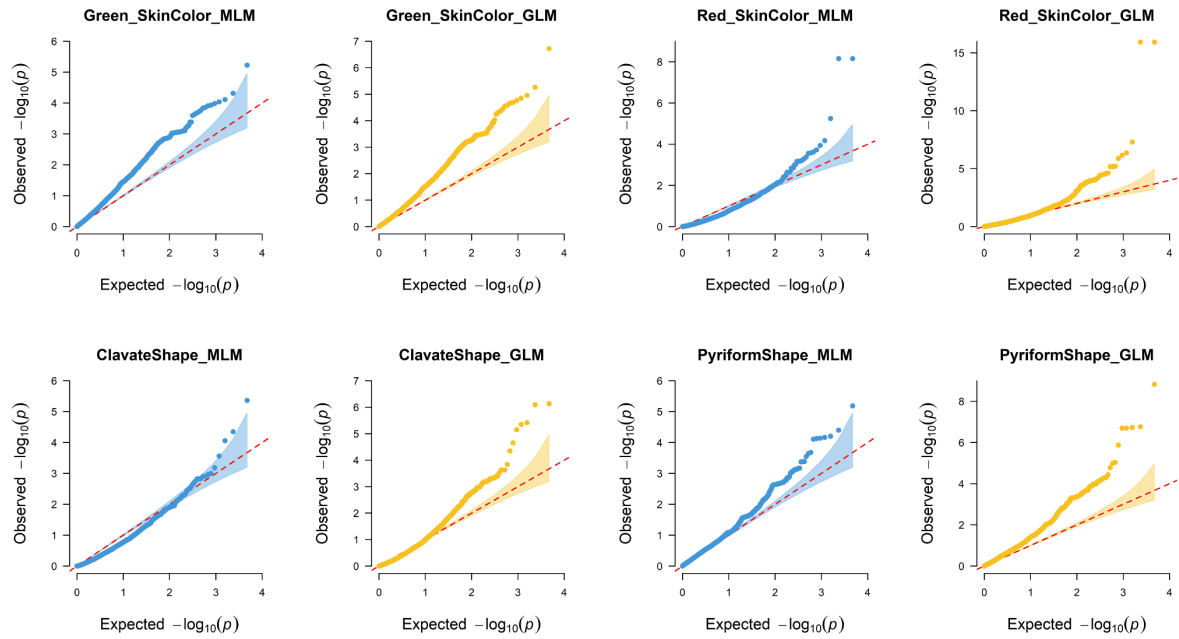

Figure S2. Quantile-Quantile (QQ) plots of the avocado fruit skin color and fruit shape genome-wide association studies using the General Linear Models (GLM) and Mixed Linear Models (MLM). Displayed are observed  $-\log_{10}(P\text{-value})$  versus expected  $-\log_{10}(P\text{-value})$ . The shaded area represents the 95% confidence interval.

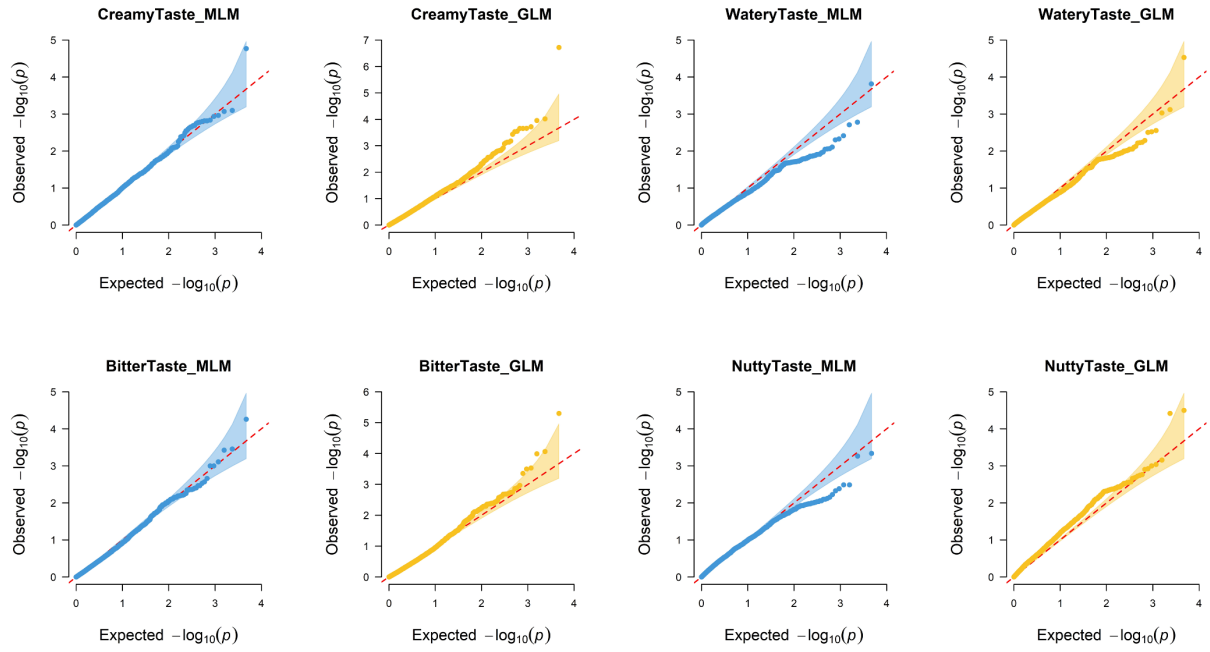

Figure S3. Quantile-Quantile (QQ) plots of the avocado fruit taste genome-wide association studies using the General Linear Models (GLM) and Mixed Linear Models (MLM). Displayed are observed  $-\log_{10}(P\text{-value})$  versus expected  $-\log_{10}(P\text{-value})$ . The shaded area represents the 95% confidence interval.

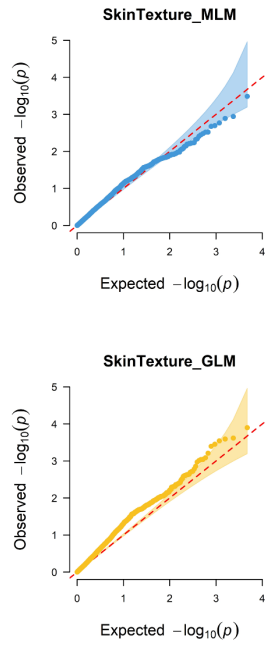

Figure S4. Quantile-Quantile (QQ) plots of the avocado skin texture association studies using the General Linear Models (GLM) and Mixed Linear Models (MLM). Displayed are observed  $-\log_{10}(P\text{-value})$  versus expected  $-\log_{10}(P\text{-value})$ . The shaded area represents the 95% confidence interval.
